# Supplementary material for: A Combined Supplement of Probiotic Strains AP-32, bv-77, and CP-9 Increased Akkermansia mucinphila and Reduced Non-Esterified Fatty Acids and Energy Metabolism in HFD-Induced Obese Rats
Source: MDPI journal article supplement (doi:10.3390/nu14030527), 2022-01-26
Supplement: s1 [file s1]

# Supplementary Material

## 1.1. Fatty acid accumulation in cultured intestinal cells

To test whether the fatty acid consumption capacity of probiotic strains affects cellular fat accumulation *in vitro*, Caco-2 cells (BCRC60182) were co-cultured with probiotic strains using a 0.4  $\mu\text{m}$  pore insert to exclude direct interactions between cells and bacteria. Briefly, Caco-2 cells were cultured at 37 °C under 5% CO<sub>2</sub> in (Dulbecco's Modified Eagle Medium) DMEM supplemented with 10% Fetal Bovine Serum (FBS). For experimentation, the cells were plated at a density of  $2 \times 10^5$  cells per well into six-well plates and were grown for 7 days in culture medium. The experimental medium was prepared as follows: 100  $\mu\text{l}$  of probiotic strain culture, grown to a concentration of  $2 \times 10^8$  cfu/ml in de Man Rogosa and Sharpe (MRS) broth, was added to 10 ml of DMEM containing 500  $\mu\text{mol/l}$  OA (Sigma-Aldrich, St. Louis, MO, USA), and the pH was adjusted to 7.4. Approximately  $2 \times 10^8$  cfu/ml probiotic strain was seeded on a Transwell membrane (SPL, Pochon, Korea) and inserted into a six-well culture plate containing Caco-2 cells. As a no-OA (Oleic acid) control group, solely DMEM was added to the Transwell without probiotic strain seeding. As a no-probiotic control, DMEM containing OA was added to the Transwell without probiotic strain seeding. After 6 h, Caco-2 cells co-cultured with probiotic strains under OA-treated conditions were collected, and TG (triglyceride) extraction and quantification were performed according to the manufacturer's protocol (Cayman Chemical, Ann Arbor, MI, USA).

## 1.2. Evaluation of feed efficiency

The animal body weight was measured every 2 weeks. The total and remaining fodder was weighed as food intake every 24 hours. Feed efficiency = (weight gain  $\div$  food intake)  $\times$  100%.

## 2. Supplementary Results

### 2.1. Three probiotic strains, AP-32, bv-77, and CP-9, reduced TG formation *in vitro*

Oleic acid (OA) is a common dietary unsaturated fatty acid in human diets, and leads to triglyceride (TG) accumulation in intestinal cells. Direct interaction of cells and bacteria was prevented by using an indirect co-culture system (Figure. S1A). The endogenous TG content was  $78.2 \pm 5.6\%$  in no-OA treated Caco-2 control, and total TG content was  $100 \pm 2.2\%$  in OA treated Caco-2 control. The supplementation of OA induced a significant TG accumulation in Caco-2 cells ( $^{***}p < 0.001$ , Figure S1B). The total TG contents were  $84.4 \pm 2.4\%$ ,  $85.3 \pm 0.6\%$ , and  $88.6 \pm 0.5\%$  in AP-32, CP-9, and bv-77 treated Caco-2 cells, respectively. The supplementation of these 3 probiotic strains significantly reduced the TG accumulation in Caco-2 cells comparing to no probiotic treated Caco-2 control ( $^{***}p < 0.001$ , Fig 1B). The total TG content was  $99.0 \pm 1.8\%$  in *Lactobacillus rhamnosus* GG (LGG) treated Caco-2 cells, and displayed no significant difference with no probiotic treated Caco-2 control.

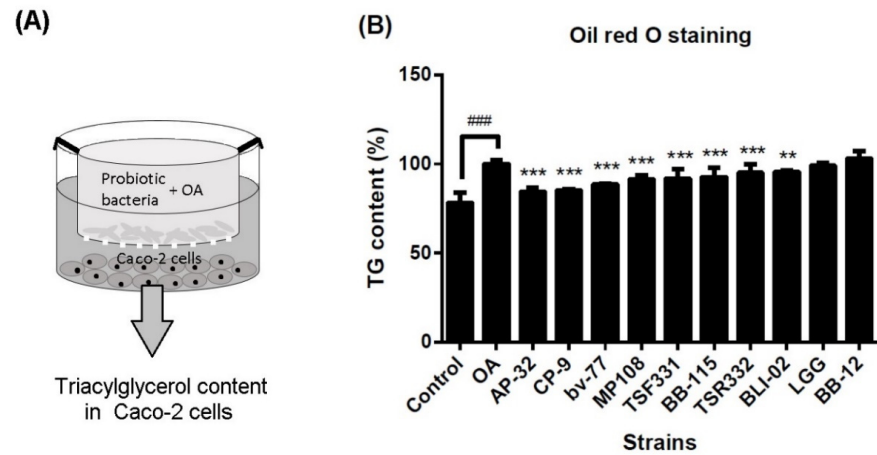

**Figure S1.** *L. salivarius* AP-32, *L. rhamnosus* bv-77, and *B. animalis* CP-9 reduced oleic acid (OA)-induced intestinal TG accumulation *in vitro*. (A) Oil Red O staining of OA-induced lipid accumulation in CaCo-2 cells co-cultured indirectly with probiotic stains. (B) OA-induced TG accumulation by the control and probiotic strains. Data are expressed as the mean  $\pm$  SD from three independent experiments. Statistical comparisons obtained by the Student's t-test,  $^{****}p < 0.001$ ,  $^{**}p < 0.01$  and  $^{***}p < 0.001$ . OA: oleic acid; TG: triacylglycerol; AP-32: *Lactobacillus salivarius* AP-32; CP-9: *Bifidobacterium animalis* CP-9; bv-77: *Lactobacillus rhamnosus* bv-77; MP108: *Lactobacillus rhamnosus* MP108; TSF331: *Lactobacillus fermentum* TSF331; BB-115: *Bifidobacterium animalis* BB-115; TSR332: *Lactobacillus reuteri* TSR332; BLI-02: *Bifidobacterium longum* BLI-02; LGG: *Lactobacillus rhamnosus* GG; BB-12: *Bifidobacterium animalis* BB-12.

## 2.2. The supplement of AP-32, bv-77, and CP-9 did not change feed efficiency in obese rats

The feed efficiencies were recorded every 2 weeks from week 1 to week 8, and all groups showed a similar dynamic change during eight weeks. Comparing to C group, high-fat diet (HFD) treatment induced a significantly ( $^{***}p < 0.001$ ) higher feed efficiency in CH group. Feed efficiencies were not affected by probiotic intervention and all probiotic groups showed similar results to CH group.

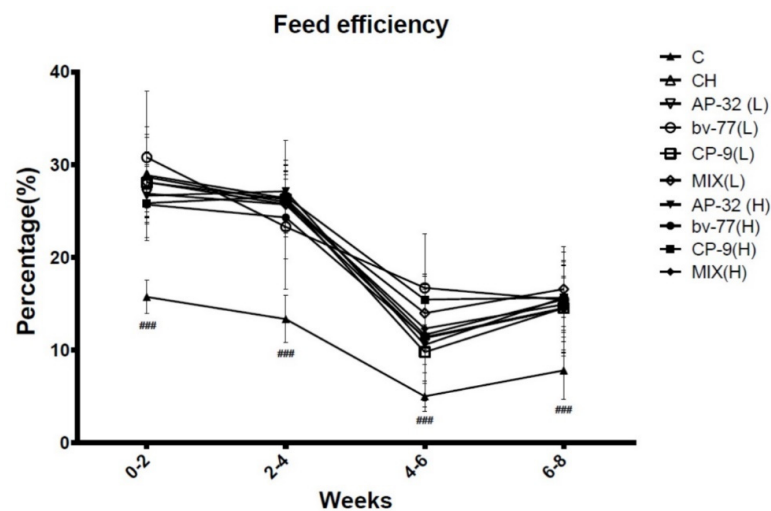

**Figure S2.** HFD treatment changed feed efficiency in rat. Body weight was measured every 2 weeks, and food intake was recorded every 24 hours. The statistical analysis was performed by using one-way ANOVA. The statistical difference was compared between C and CH group ( $^{***}p < 0.005$ ), or between CH and a probiotics-treated group.

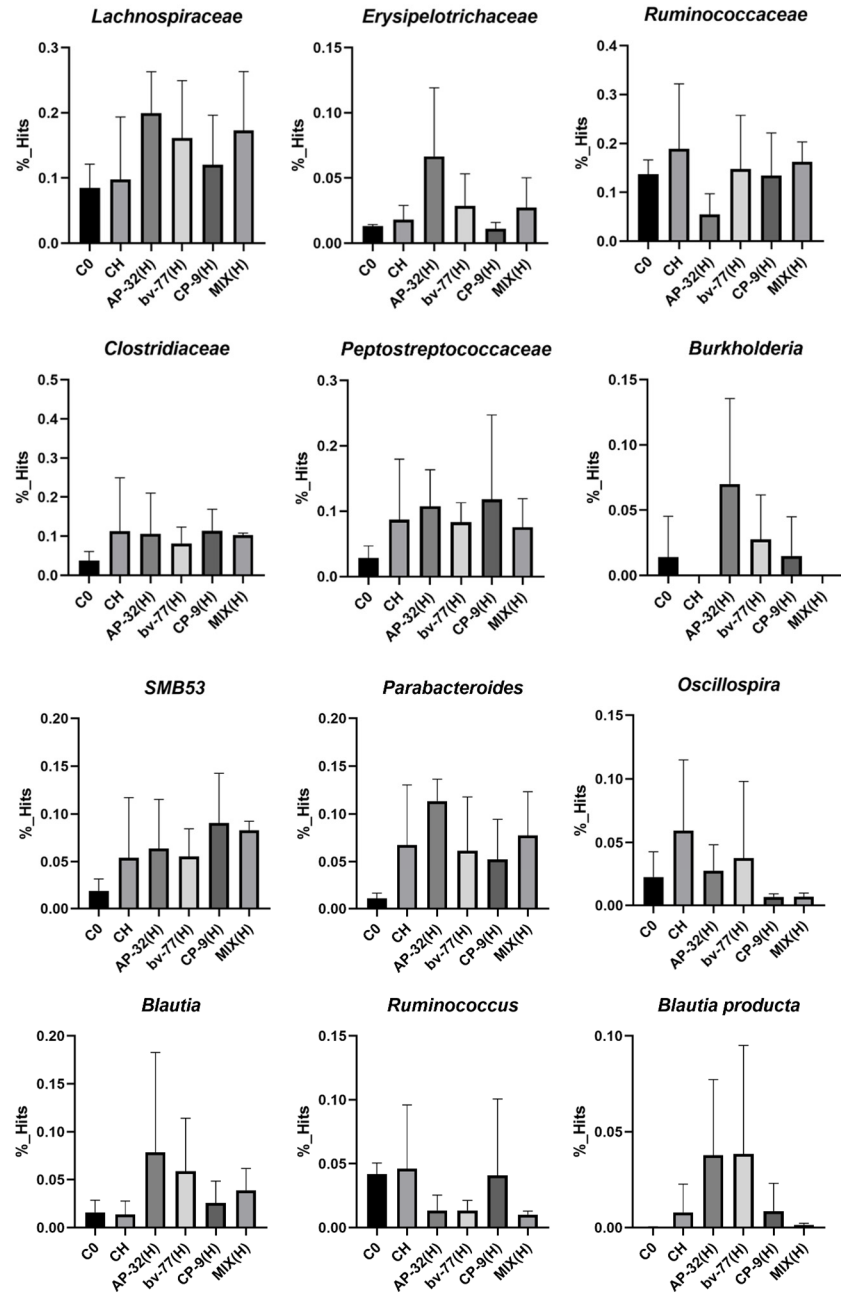

**Figure S3.** Heatmap analysis of core gut microbial alterations by 8-week probiotic treatments. According to Heatmap analysis results, the results did not show any significant change after probiotic treatment.

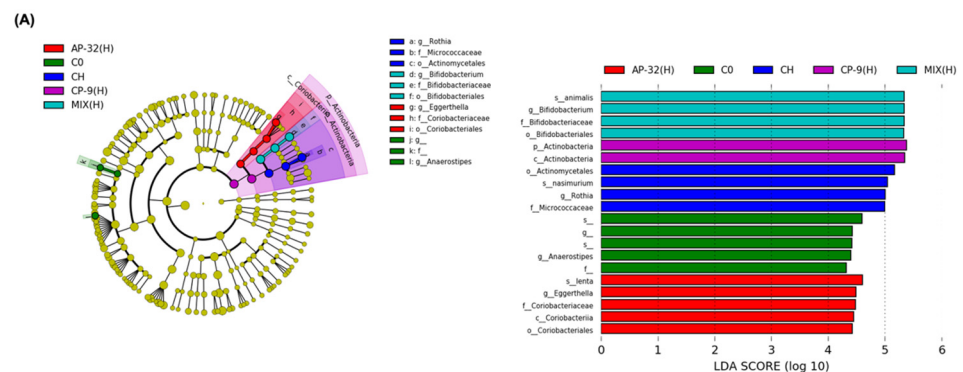

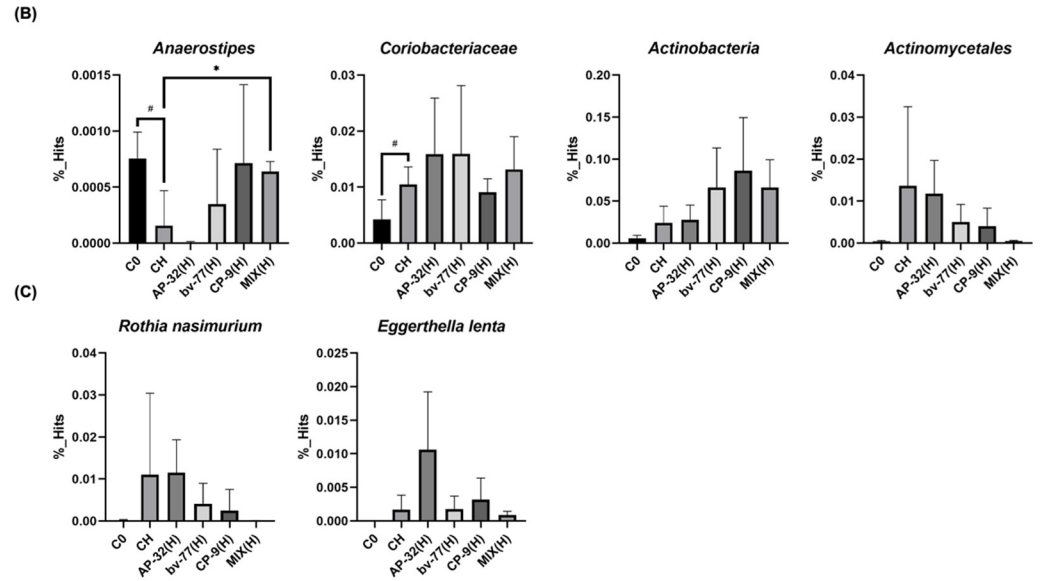

**Figure S4.** Core gut microbiota changed after 8-week probiotic treatment. (A) After 8-week probiotic treatment, core microbiota analysis by the LEfSe analysis. (B & C) Core microbiota in genus and species level were analyzed and showed as bar plot. *Anaerostipe spp.* was significantly increased compared to CH (HFD) control. The statistical analyses were performed by using the Student's t-test. Statistical difference is showed as comparison between C0 and CH group ( $^{\#}p<0.05$ ,  $^{\#\#}p<0.01$ ,  $^{\#\#\#}p<0.001$ ), or CH and probiotics-treated group ( $^*p<0.05$ ,  $^{**}p<0.01$ ,  $^{***}p<0.001$ ).

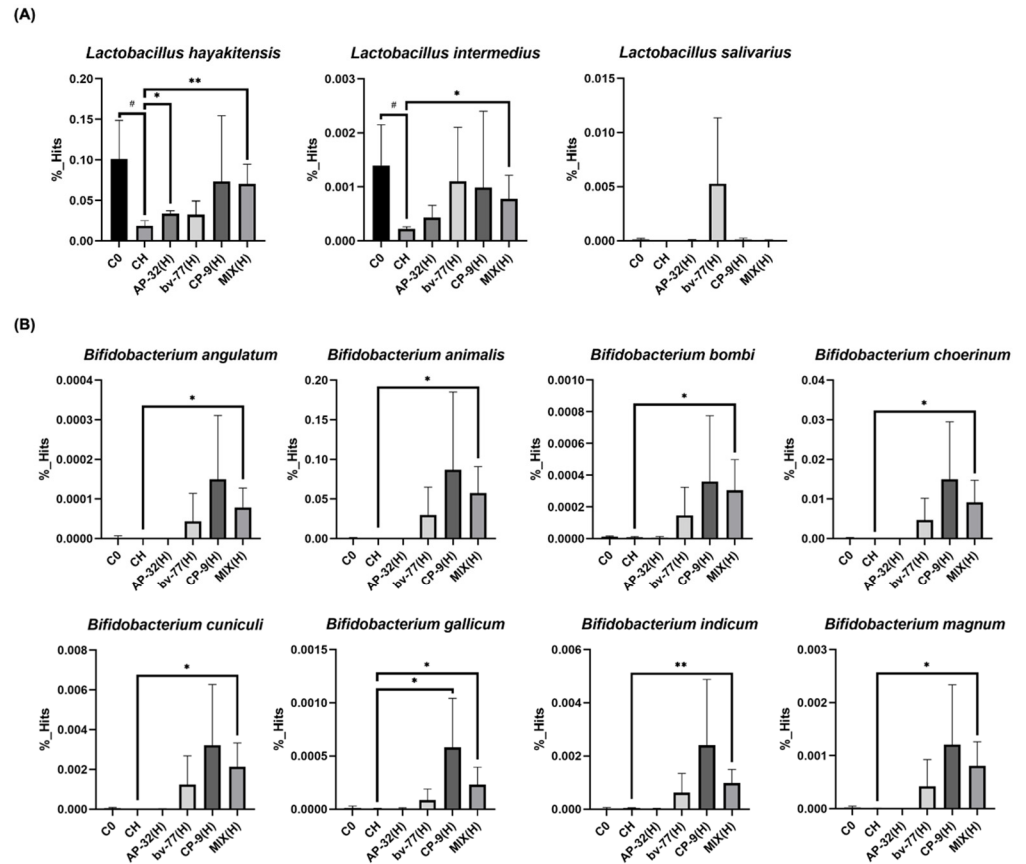

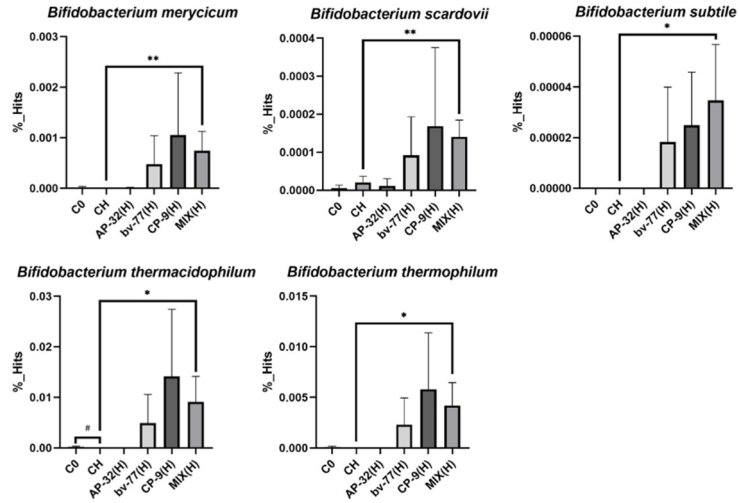

**Figure S5.** *Lactobacillus* and *Bifidobacterium* were significantly increased after 8-week probiotic treatment. (A) *Lactobacillus hayakitensis* and *Lactobacillus intermedius* were significantly increased after 8-week combined treatment of 3 probiotic strains (MIX(H)) as compared to high-fat diet treated control (CH). (B) All *Bifidobacterium* in species level were significantly increased after 8-week combined treatment of 3 probiotic strains (MIX(H)). The data showed the mean $\pm$ SD of each group. The statistical analyses were performed by using Student's t-test. Statistical difference is showed as comparison between C0 and CH group (\* $p$ <0.05, \*\* $p$ <0.01, \*\*\* $p$ <0.001), or CH and probiotics-treated group (\* $p$ <0.05, \*\* $p$ <0.01, \*\*\* $p$ <0.001).

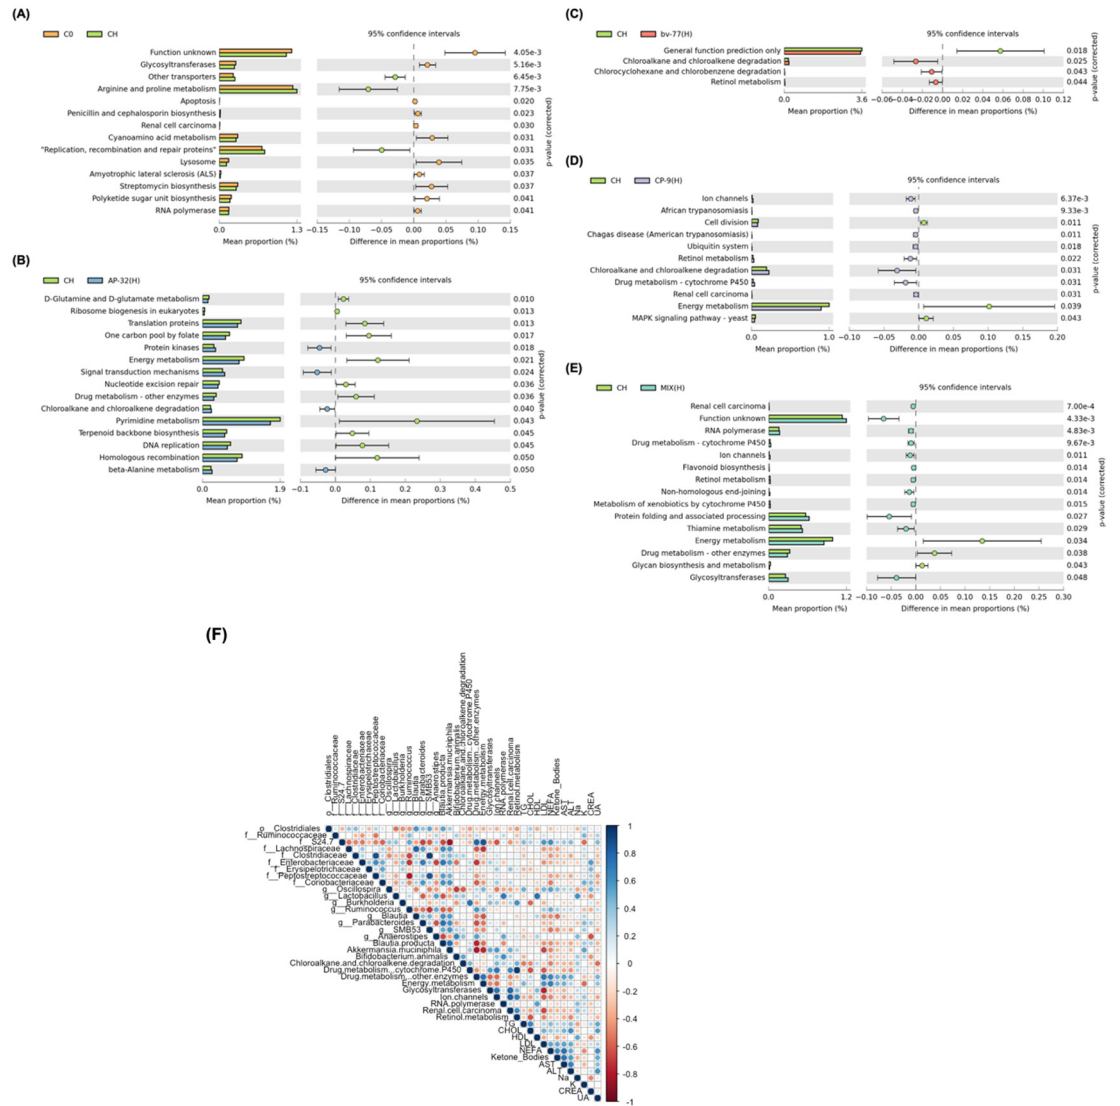

**Figure S6.** Functional pathways analysis after 8-week probiotic treatment by PICRUST analysis. Functional pathways analysis was utilized PICRUST and plotted by STAMP (v2.1.3, <https://beiko-lab.cs.dal.ca/software/STAMP>, June 26, 2015). (A~E) Functional pathways were significantly changed after probiotic treatment. (F) Correlation among core microbiota, biochemistry and functional pathways were analyzed by Spearman's correlation.
